# Supplementary material for: Metal Catalysis Acting on Nitriles in Early Earth Hydrothermal Systems
Source: MDPI journal article supplement (doi:10.3390/life13071524), 2023-07-07
Supplement: s1 [file s1]

Archive with 6 entries (6 files):
- SF1- Standards H-NMR Spectra.pdf
- SF2- Acetonitrile 90C H-NMR Spectra.pdf
- SF3- Malononitrile 90C H-NMR Spectra.pdf
- SF4- Acetonitrile 20C H-NMR Spectra.pdf
- SF5- Malononitrile 20C H-NMR Spectra.pdf
- ST1- XRD Angles.xlsx
