# Supplementary material for: Metal Catalysis Acting on Nitriles in Early Earth Hydrothermal Systems
Source: MDPI journal article supplement (doi:10.3390/life13071524), 2023-07-07
Supplement: s1 [file s1 › ST1- XRD Angles.xlsx]

## Sheet: Sheet1
acetonitrile_FeS (control)	malononitrile_FeS
Wavelength = 1.78899Å (Co)	Wavelength = 1.78899Å (Co)
Angle	Angle
10.0042	10.3969
10.0125	10.4053
10.0209	10.4136
10.0292	10.422
10.0376	10.4303
10.046	10.4387
10.0543	10.4471
10.0627	10.4554
10.071	10.4638
10.0794	10.4721
10.0877	10.4805
10.0961	10.4888
10.1044	10.4972
10.1128	10.5055
10.1212	10.5139
10.1295	10.5222
10.1379	10.5306
10.1462	10.539
10.1546	10.5473
10.1629	10.5557
10.1713	10.564
10.1797	10.5724
10.188	10.5807
10.1964	10.5891
10.2047	10.5975
10.2131	10.6058
10.2214	10.6142
10.2298	10.6225
10.2381	10.6309
10.2465	10.6392
10.2549	10.6476
10.2632	10.656
10.2716	10.6643
10.2799	10.6727
10.2883	10.681
10.2966	10.6894
10.305	10.6977
10.3133	10.7061
10.3217	10.7144
10.3301	10.7228
10.3384	10.7311
10.3468	10.7395
10.3551	10.7479
10.3635	10.7562
10.3718	10.7646
10.3802	10.7729
10.3886	10.7813
10.3969	10.7896
10.4053	10.798
10.4136	10.8064
10.422	10.8147
10.4303	10.8231
10.4387	10.8314
10.4471	10.8398
10.4554	10.8481
10.4638	10.8565
10.4721	10.8649
10.4805	10.8732
10.4888	10.8816
10.4972	10.8899
10.5055	10.8983
10.5139	10.9066
10.5222	10.915
10.5306	10.9233
10.539	10.9317
10.5473	10.94
10.5557	10.9484
10.564	10.9568
10.5724	10.9651
10.5807	10.9735
10.5891	10.9818
10.5975	10.9902
10.6058	10.9985
10.6142	11.0069
10.6225	11.0152
10.6309	11.0236
10.6392	11.032
10.6476	11.0403
10.656	11.0487
10.6643	11.057
10.6727	11.0654
10.681	11.0738
10.6894	11.0821
10.6977	11.0905
10.7061	11.0988
10.7144	11.1072
10.7228	11.1155
10.7311	11.1239
10.7395	11.1322
10.7479	11.1406
10.7562	11.1489
10.7646	11.1573
10.7729	11.1657
10.7813	11.174
10.7896	11.1824
10.798	11.1907
10.8064	11.1991
10.8147	11.2074
10.8231	11.2158
10.8314	11.2241
10.8398	11.2325
10.8481	11.2409
10.8565	11.2492
10.8649	11.2576
10.8732	11.2659
10.8816	11.2743
10.8899	11.2827
10.8983	11.291
10.9066	11.2994
10.915	11.3077
10.9233	11.3161
10.9317	11.3244
10.94	11.3328
10.9484	11.3411
10.9568	11.3495
10.9651	11.3578
10.9735	11.3662
10.9818	11.3746
10.9902	11.3829
10.9985	11.3913
11.0069	11.3996
11.0152	11.408
11.0236	11.4163
11.032	11.4247
11.0403	11.433
11.0487	11.4414
11.057	11.4498
11.0654	11.4581
11.0738	11.4665
11.0821	11.4748
11.0905	11.4832
11.0988	11.4916
11.1072	11.4999
11.1155	11.5083
11.1239	11.5166
11.1322	11.525
11.1406	11.5333
11.1489	11.5417
11.1573	11.55
11.1657	11.5584
11.174	11.5668
11.1824	11.5751
11.1907	11.5835
11.1991	11.5918
11.2074	11.6002
11.2158	11.6085
11.2241	11.6169
11.2325	11.6252
11.2409	11.6336
11.2492	11.6419
11.2576	11.6503
11.2659	11.6587
11.2743	11.667
11.2827	11.6754
11.291	11.6837
11.2994	11.6921
11.3077	11.7005
11.3161	11.7088
11.3244	11.7172
11.3328	11.7255
11.3411	11.7339
11.3495	11.7422
11.3578	11.7506
11.3662	11.7589
11.3746	11.7673
11.3829	11.7757
11.3913	11.784
11.3996	11.7924
11.408	11.8007
11.4163	11.8091
11.4247	11.8174
11.433	11.8258
11.4414	11.8341
11.4498	11.8425
11.4581	11.8508
11.4665	11.8592
11.4748	11.8676
11.4832	11.8759
11.4916	11.8843
11.4999	11.8926
11.5083	11.901
11.5166	11.9093
11.525	11.9177
11.5333	11.9261
11.5417	11.9344
11.55	11.9428
11.5584	11.9511
11.5668	11.9595
11.5751	11.9678
11.5835	11.9762
11.5918	11.9846
11.6002	11.9929
11.6085	12.0013
11.6169	12.0096
11.6252	12.018
11.6336	12.0263
11.6419	12.0347
11.6503	12.043
11.6587	12.0514
11.667	12.0597
11.6754	12.0681
11.6837	12.0765
11.6921	12.0848
11.7005	12.0932
11.7088	12.1015
11.7172	12.1099
11.7255	12.1182
11.7339	12.1266
11.7422	12.135
11.7506	12.1433
11.7589	12.1517
11.7673	12.16
11.7757	12.1684
11.784	12.1767
11.7924	12.1851
11.8007	12.1935
11.8091	12.2018
11.8174	12.2102
11.8258	12.2185
11.8341	12.2269
11.8425	12.2352
11.8508	12.2436
11.8592	12.2519
11.8676	12.2603
11.8759	12.2686
11.8843	12.277
11.8926	12.2854
11.901	12.2937
11.9093	12.3021
11.9177	12.3104
11.9261	12.3188
11.9344	12.3271
11.9428	12.3355
11.9511	12.3439
11.9595	12.3522
11.9678	12.3606
11.9762	12.3689
11.9846	12.3773
11.9929	12.3856
12.0013	12.394
12.0096	12.4024
12.018	12.4107
12.0263	12.4191
12.0347	12.4274
12.043	12.4358
12.0514	12.4441
12.0597	12.4525
12.0681	12.4608
12.0765	12.4692
12.0848	12.4776
12.0932	12.4859
12.1015	12.4943
12.1099	12.5026
12.1182	12.511
12.1266	12.5193
12.135	12.5277
12.1433	12.536
12.1517	12.5444
12.16	12.5528
12.1684	12.5611
12.1767	12.5695
12.1851	12.5778
12.1935	12.5862
12.2018	12.5945
12.2102	12.6029
12.2185	12.6113
12.2269	12.6196
12.2352	12.628
12.2436	12.6363
12.2519	12.6447
12.2603	12.653
12.2686	12.6614
12.277	12.6697
12.2854	12.6781
12.2937	12.6865
12.3021	12.6948
12.3104	12.7032
12.3188	12.7115
12.3271	12.7199
12.3355	12.7282
12.3439	12.7366
12.3522	12.7449
12.3606	12.7533
12.3689	12.7617
12.3773	12.77
12.3856	12.7784
12.394	12.7867
12.4024	12.7951
12.4107	12.8034
12.4191	12.8118
12.4274	12.8201
12.4358	12.8285
12.4441	12.8369
12.4525	12.8452
12.4608	12.8536
12.4692	12.8619
12.4776	12.8703
12.4859	12.8786
12.4943	12.887
12.5026	12.8954
12.511	12.9037
12.5193	12.9121
12.5277	12.9204
12.536	12.9288
12.5444	12.9371
12.5528	12.9455
12.5611	12.9538
12.5695	12.9622
12.5778	12.9706
12.5862	12.9789
12.5945	12.9873
12.6029	12.9956
12.6113	13.004
12.6196	13.0123
12.628	13.0207
12.6363	13.029
12.6447	13.0374
12.653	13.0458
12.6614	13.0541
12.6697	13.0625
12.6781	13.0708
12.6865	13.0792
12.6948	13.0875
12.7032	13.0959
12.7115	13.1043
12.7199	13.1126
12.7282	13.121
12.7366	13.1293
12.7449	13.1377
12.7533	13.146
12.7617	13.1544
12.77	13.1628
12.7784	13.1711
12.7867	13.1795
12.7951	13.1878
12.8034	13.1962
12.8118	13.2045
12.8201	13.2129
12.8285	13.2212
12.8369	13.2296
12.8452	13.2379
12.8536	13.2463
12.8619	13.2547
12.8703	13.263
12.8786	13.2714
12.887	13.2797
12.8954	13.2881
12.9037	13.2964
12.9121	13.3048
12.9204	13.3132
12.9288	13.3215
12.9371	13.3299
12.9455	13.3382
12.9538	13.3466
12.9622	13.3549
12.9706	13.3633
12.9789	13.3717
12.9873	13.38
12.9956	13.3884
13.004	13.3967
13.0123	13.4051
13.0207	13.4134
13.029	13.4218
13.0374	13.4301
13.0458	13.4385
13.0541	13.4468
13.0625	13.4552
13.0708	13.4636
13.0792	13.4719
13.0875	13.4803
13.0959	13.4886
13.1043	13.497
13.1126	13.5053
13.121	13.5137
13.1293	13.5221
13.1377	13.5304
13.146	13.5388
13.1544	13.5471
13.1628	13.5555
13.1711	13.5638
13.1795	13.5722
13.1878	13.5806
13.1962	13.5889
13.2045	13.5973
13.2129	13.6056
13.2212	13.614
13.2296	13.6223
13.2379	13.6307
13.2463	13.639
13.2547	13.6474
13.263	13.6557
13.2714	13.6641
13.2797	13.6725
13.2881	13.6808
13.2964	13.6892
13.3048	13.6975
13.3132	13.7059
13.3215	13.7142
13.3299	13.7226
13.3382	13.7309
13.3466	13.7393
13.3549	13.7477
13.3633	13.756
13.3717	13.7644
13.38	13.7727
13.3884	13.7811
13.3967	13.7895
13.4051	13.7978
13.4134	13.8062
13.4218	13.8145
13.4301	13.8229
13.4385	13.8312
13.4468	13.8396
13.4552	13.8479
13.4636	13.8563
13.4719	13.8646
13.4803	13.873
13.4886	13.8814
13.497	13.8897
13.5053	13.8981
13.5137	13.9064
13.5221	13.9148
13.5304	13.9231
13.5388	13.9315
13.5471	13.9398
13.5555	13.9482
13.5638	13.9566
13.5722	13.9649
13.5806	13.9733
13.5889	13.9816
13.5973	13.99
13.6056	13.9984
13.614	14.0067
13.6223	14.0151
13.6307	14.0234
13.639	14.0318
13.6474	14.0401
13.6557	14.0485
13.6641	14.0568
13.6725	14.0652
13.6808	14.0735
13.6892	14.0819
13.6975	14.0903
13.7059	14.0986
13.7142	14.107
13.7226	14.1153
13.7309	14.1237
13.7393	14.132
13.7477	14.1404
13.756	14.1487
13.7644	14.1571
13.7727	14.1655
13.7811	14.1738
13.7895	14.1822
13.7978	14.1905
13.8062	14.1989
13.8145	14.2073
13.8229	14.2156
13.8312	14.224
13.8396	14.2323
13.8479	14.2407
13.8563	14.249
13.8646	14.2574
13.873	14.2657
13.8814	14.2741
13.8897	14.2825
13.8981	14.2908
13.9064	14.2992
13.9148	14.3075
13.9231	14.3159
13.9315	14.3242
13.9398	14.3326
13.9482	14.3409
13.9566	14.3493
13.9649	14.3576
13.9733	14.366
13.9816	14.3744
13.99	14.3827
13.9984	14.3911
14.0067	14.3994
14.0151	14.4078
14.0234	14.4162
14.0318	14.4245
14.0401	14.4329
14.0485	14.4412
14.0568	14.4496
14.0652	14.4579
14.0735	14.4663
14.0819	14.4746
14.0903	14.483
14.0986	14.4914
14.107	14.4997
14.1153	14.5081
14.1237	14.5164
14.132	14.5248
14.1404	14.5331
14.1487	14.5415
14.1571	14.5498
14.1655	14.5582
14.1738	14.5665
14.1822	14.5749
14.1905	14.5833
14.1989	14.5916
14.2073	14.6
14.2156	14.6083
14.224	14.6167
14.2323	14.625
14.2407	14.6334
14.249	14.6418
14.2574	14.6501
14.2657	14.6585
14.2741	14.6668
14.2825	14.6752
14.2908	14.6835
14.2992	14.6919
14.3075	14.7003
14.3159	14.7086
14.3242	14.717
14.3326	14.7253
14.3409	14.7337
14.3493	14.742
14.3576	14.7504
14.366	14.7587
14.3744	14.7671
14.3827	14.7754
14.3911	14.7838
14.3994	14.7922
14.4078	14.8005
14.4162	14.8089
14.4245	14.8172
14.4329	14.8256
14.4412	14.8339
14.4496	14.8423
14.4579	14.8507
14.4663	14.859
14.4746	14.8674
14.483	14.8757
14.4914	14.8841
14.4997	14.8924
14.5081	14.9008
14.5164	14.9092
14.5248	14.9175
14.5331	14.9259
14.5415	14.9342
14.5498	14.9426
14.5582	14.9509
14.5665	14.9593
14.5749	14.9676
14.5833	14.976
14.5916	14.9843
14.6	14.9927
14.6083	15.0011
14.6167	15.0094
14.625	15.0178
14.6334	15.0261
14.6418	15.0345
14.6501	15.0428
14.6585	15.0512
14.6668	15.0596
14.6752	15.0679
14.6835	15.0763
14.6919	15.0846
14.7003	15.093
14.7086	15.1013
14.717	15.1097
14.7253	15.1181
14.7337	15.1264
14.742	15.1348
14.7504	15.1431
14.7587	15.1515
14.7671	15.1598
14.7754	15.1682
14.7838	15.1765
14.7922	15.1849
14.8005	15.1933
14.8089	15.2016
14.8172	15.21
14.8256	15.2183
14.8339	15.2267
14.8423	15.235
14.8507	15.2434
14.859	15.2517
14.8674	15.2601
14.8757	15.2685
14.8841	15.2768
14.8924	15.2852
14.9008	15.2935
14.9092	15.3019
14.9175	15.3102
14.9259	15.3186
14.9342	15.327
14.9426	15.3353
14.9509	15.3437
14.9593	15.352
14.9676	15.3604
14.976	15.3687
14.9843	15.3771
14.9927	15.3854
15.0011	15.3938
15.0094	15.4022
15.0178	15.4105
15.0261	15.4189
15.0345	15.4272
15.0428	15.4356
15.0512	15.4439
15.0596	15.4523
15.0679	15.4606
15.0763	15.469
15.0846	15.4774
15.093	15.4857
15.1013	15.4941
15.1097	15.5024
15.1181	15.5108
15.1264	15.5191
15.1348	15.5275
15.1431	15.5358
15.1515	15.5442
15.1598	15.5526
15.1682	15.5609
15.1765	15.5693
15.1849	15.5776
15.1933	15.586
15.2016	15.5943
15.21	15.6027
15.2183	15.6111
15.2267	15.6194
15.235	15.6278
15.2434	15.6361
15.2517	15.6445
15.2601	15.6528
15.2685	15.6612
15.2768	15.6695
15.2852	15.6779
15.2935	15.6863
15.3019	15.6946
15.3102	15.703
15.3186	15.7113
15.327	15.7197
15.3353	15.728
15.3437	15.7364
15.352	15.7447
15.3604	15.7531
15.3687	15.7615
15.3771	15.7698
15.3854	15.7782
15.3938	15.7865
15.4022	15.7949
15.4105	15.8032
15.4189	15.8116
15.4272	15.82
15.4356	15.8283
15.4439	15.8367
15.4523	15.845
15.4606	15.8534
15.469	15.8617
15.4774	15.8701
15.4857	15.8785
15.4941	15.8868
15.5024	15.8952
15.5108	15.9035
15.5191	15.9119
15.5275	15.9202
15.5358	15.9286
15.5442	15.9369
15.5526	15.9453
15.5609	15.9536
15.5693	15.962
15.5776	15.9704
15.586	15.9787
15.5943	15.9871
15.6027	15.9954
15.6111	16.0038
15.6194	16.0121
15.6278	16.0205
15.6361	16.0288
15.6445	16.0372
15.6528	16.0456
15.6612	16.0539
15.6695	16.0623
15.6779	16.0706
15.6863	16.079
15.6946	16.0874
15.703	16.0957
15.7113	16.1041
15.7197	16.1124
15.728	16.1208
15.7364	16.1291
15.7447	16.1375
15.7531	16.1458
15.7615	16.1542
15.7698	16.1625
15.7782	16.1709
15.7865	16.1793
15.7949	16.1876
15.8032	16.196
15.8116	16.2043
15.82	16.2127
15.8283	16.221
15.8367	16.2294
15.845	16.2377
15.8534	16.2461
15.8617	16.2545
15.8701	16.2628
15.8785	16.2712
15.8868	16.2795
15.8952	16.2879
15.9035	16.2963
15.9119	16.3046
15.9202	16.313
15.9286	16.3213
15.9369	16.3297
15.9453	16.338
15.9536	16.3464
15.962	16.3547
15.9704	16.3631
15.9787	16.3714
15.9871	16.3798
15.9954	16.3882
16.0038	16.3965
16.0121	16.4049
16.0205	16.4132
16.0288	16.4216
16.0372	16.4299
16.0456	16.4383
16.0539	16.4467
16.0623	16.455
16.0706	16.4634
16.079	16.4717
16.0874	16.4801
16.0957	16.4884
16.1041	16.4968
16.1124	16.5052
16.1208	16.5135
16.1291	16.5219
16.1375	16.5302
16.1458	16.5386
16.1542	16.5469
16.1625	16.5553
16.1709	16.5636
16.1793	16.572
16.1876	16.5803
16.196	16.5887
16.2043	16.5971
16.2127	16.6054
16.221	16.6138
16.2294	16.6221
16.2377	16.6305
16.2461	16.6388
16.2545	16.6472
16.2628	16.6556
16.2712	16.6639
16.2795	16.6723
16.2879	16.6806
16.2963	16.689
16.3046	16.6973
16.313	16.7057
16.3213	16.7141
16.3297	16.7224
16.338	16.7308
16.3464	16.7391
16.3547	16.7475
16.3631	16.7558
16.3714	16.7642
16.3798	16.7725
16.3882	16.7809
16.3965	16.7892
16.4049	16.7976
16.4132	16.806
16.4216	16.8143
16.4299	16.8227
16.4383	16.831
16.4467	16.8394
16.455	16.8477
16.4634	16.8561
16.4717	16.8645
16.4801	16.8728
16.4884	16.8812
16.4968	16.8895
16.5052	16.8979
16.5135	16.9062
16.5219	16.9146
16.5302	16.923
16.5386	16.9313
16.5469	16.9397
16.5553	16.948
16.5636	16.9564
16.572	16.9647
16.5803	16.9731
16.5887	16.9814
16.5971	16.9898
16.6054	16.9981
16.6138	17.0065
16.6221	17.0149
16.6305	17.0232
16.6388	17.0316
16.6472	17.0399
16.6556	17.0483
16.6639	17.0566
16.6723	17.065
16.6806	17.0734
16.689	17.0817
16.6973	17.0901
16.7057	17.0984
16.7141	17.1068
16.7224	17.1151
16.7308	17.1235
16.7391	17.1319
16.7475	17.1402
16.7558	17.1486
16.7642	17.1569
16.7725	17.1653
16.7809	17.1736
16.7892	17.182
16.7976	17.1903
16.806	17.1987
16.8143	17.207
16.8227	17.2154
16.831	17.2238
16.8394	17.2321
16.8477	17.2405
16.8561	17.2488
16.8645	17.2572
16.8728	17.2655
16.8812	17.2739
16.8895	17.2823
16.8979	17.2906
16.9062	17.299
16.9146	17.3073
16.923	17.3157
16.9313	17.324
16.9397	17.3324
16.948	17.3407
16.9564	17.3491
16.9647	17.3575
16.9731	17.3658
16.9814	17.3742
16.9898	17.3825
16.9981	17.3909
17.0065	17.3992
17.0149	17.4076
17.0232	17.4159
17.0316	17.4243
17.0399	17.4327
17.0483	17.441
17.0566	17.4494
17.065	17.4577
17.0734	17.4661
17.0817	17.4744
17.0901	17.4828
17.0984	17.4912
17.1068	17.4995
17.1151	17.5079
17.1235	17.5162
17.1319	17.5246
17.1402	17.5329
17.1486	17.5413
17.1569	17.5496
17.1653	17.558
17.1736	17.5664
17.182	17.5747
17.1903	17.5831
17.1987	17.5914
17.207	17.5998
17.2154	17.6081
17.2238	17.6165
17.2321	17.6248
17.2405	17.6332
17.2488	17.6416
17.2572	17.6499
17.2655	17.6583
17.2739	17.6666
17.2823	17.675
17.2906	17.6833
17.299	17.6917
17.3073	17.7001
17.3157	17.7084
17.324	17.7168
17.3324	17.7251
17.3407	17.7335
17.3491	17.7418
17.3575	17.7502
17.3658	17.7585
17.3742	17.7669
17.3825	17.7753
17.3909	17.7836
17.3992	17.792
17.4076	17.8003
17.4159	17.8087
17.4243	17.817
17.4327	17.8254
17.441	17.8337
17.4494	17.8421
17.4577	17.8505
17.4661	17.8588
17.4744	17.8672
17.4828	17.8755
17.4912	17.8839
17.4995	17.8922
17.5079	17.9006
17.5162	17.909
17.5246	17.9173
17.5329	17.9257
17.5413	17.934
17.5496	17.9424
17.558	17.9507
17.5664	17.9591
17.5747	17.9674
17.5831	17.9758
17.5914	17.9842
17.5998	17.9925
17.6081	18.0009
17.6165	18.0092
17.6248	18.0176
17.6332	18.0259
17.6416	18.0343
17.6499	18.0426
17.6583	18.051
17.6666	18.0594
17.675	18.0677
17.6833	18.0761
17.6917	18.0844
17.7001	18.0928
17.7084	18.1011
17.7168	18.1095
17.7251	18.1179
17.7335	18.1262
17.7418	18.1346
17.7502	18.1429
17.7585	18.1513
17.7669	18.1596
17.7753	18.168
17.7836	18.1763
17.792	18.1847
17.8003	18.1931
17.8087	18.2014
17.817	18.2098
17.8254	18.2181
17.8337	18.2265
17.8421	18.2348
17.8505	18.2432
17.8588	18.2516
17.8672	18.2599
17.8755	18.2683
17.8839	18.2766
17.8922	18.285
17.9006	18.2933
17.909	18.3017
17.9173	18.31
17.9257	18.3184
17.934	18.3268
17.9424	18.3351
17.9507	18.3435
17.9591	18.3518
17.9674	18.3602
17.9758	18.3685
17.9842	18.3769
17.9925	18.3852
18.0009	18.3936
18.0092	18.402
18.0176	18.4103
18.0259	18.4187
18.0343	18.427
18.0426	18.4354
18.051	18.4437
18.0594	18.4521
18.0677	18.4605
18.0761	18.4688
18.0844	18.4772
18.0928	18.4855
18.1011	18.4939
18.1095	18.5022
18.1179	18.5106
18.1262	18.5189
18.1346	18.5273
18.1429	18.5357
18.1513	18.544
18.1596	18.5524
18.168	18.5607
18.1763	18.5691
18.1847	18.5774
18.1931	18.5858
18.2014	18.5941
18.2098	18.6025
18.2181	18.6109
18.2265	18.6192
18.2348	18.6276
18.2432	18.6359
18.2516	18.6443
18.2599	18.6526
18.2683	18.661
18.2766	18.6694
18.285	18.6777
18.2933	18.6861
18.3017	18.6944
18.31	18.7028
18.3184	18.7111
18.3268	18.7195
18.3351	18.7278
18.3435	18.7362
18.3518	18.7446
18.3602	18.7529
18.3685	18.7613
18.3769	18.7696
18.3852	18.778
18.3936	18.7863
18.402	18.7947
18.4103	18.803
18.4187	18.8114
18.427	18.8198
18.4354	18.8281
18.4437	18.8365
18.4521	18.8448
18.4605	18.8532
18.4688	18.8615
18.4772	18.8699
18.4855	18.8783
18.4939	18.8866
18.5022	18.895
18.5106	18.9033
18.5189	18.9117
18.5273	18.92
18.5357	18.9284
18.544	18.9367
18.5524	18.9451
18.5607	18.9535
18.5691	18.9618
18.5774	18.9702
18.5858	18.9785
18.5941	18.9869
18.6025	18.9952
18.6109	19.0036
18.6192	19.0119
18.6276	19.0203
18.6359	19.0287
18.6443	19.037
18.6526	19.0454
18.661	19.0537
18.6694	19.0621
18.6777	19.0704
18.6861	19.0788
18.6944	19.0872
18.7028	19.0955
18.7111	19.1039
18.7195	19.1122
18.7278	19.1206
18.7362	19.1289
18.7446	19.1373
18.7529	19.1456
18.7613	19.154
18.7696	19.1623
18.778	19.1707
18.7863	19.1791
18.7947	19.1874
18.803	19.1958
18.8114	19.2041
18.8198	19.2125
18.8281	19.2208
18.8365	19.2292
18.8448	19.2376
18.8532	19.2459
18.8615	19.2543
18.8699	19.2626
18.8783	19.271
18.8866	19.2793
18.895	19.2877
18.9033	19.2961
18.9117	19.3044
18.92	19.3128
18.9284	19.3211
18.9367	19.3295
18.9451	19.3378
18.9535	19.3462
18.9618	19.3545
18.9702	19.3629
18.9785	19.3712
18.9869	19.3796
18.9952	19.388
19.0036	19.3963
19.0119	19.4047
19.0203	19.413
19.0287	19.4214
19.037	19.4297
19.0454	19.4381
19.0537	19.4465
19.0621	19.4548
19.0704	19.4632
19.0788	19.4715
19.0872	19.4799
19.0955	19.4882
19.1039	19.4966
19.1122	19.505
19.1206	19.5133
19.1289	19.5217
19.1373	19.53
19.1456	19.5384
19.154	19.5467
19.1623	19.5551
19.1707	19.5634
19.1791	19.5718
19.1874	19.5801
19.1958	19.5885
19.2041	19.5969
19.2125	19.6052
19.2208	19.6136
19.2292	19.6219
19.2376	19.6303
19.2459	19.6386
19.2543	19.647
19.2626	19.6554
19.271	19.6637
19.2793	19.6721
19.2877	19.6804
19.2961	19.6888
19.3044	19.6971
19.3128	19.7055
19.3211	19.7139
19.3295	19.7222
19.3378	19.7306
19.3462	19.7389
19.3545	19.7473
19.3629	19.7556
19.3712	19.764
19.3796	19.7723
19.388	19.7807
19.3963	19.789
19.4047	19.7974
19.413	19.8058
19.4214	19.8141
19.4297	19.8225
19.4381	19.8308
19.4465	19.8392
19.4548	19.8475
19.4632	19.8559
19.4715	19.8643
19.4799	19.8726
19.4882	19.881
19.4966	19.8893
19.505	19.8977
19.5133	19.906
19.5217	19.9144
19.53	19.9228
19.5384	19.9311
19.5467	19.9395
19.5551	19.9478
19.5634	19.9562
19.5718	19.9645
19.5801	19.9729
19.5885	19.9812
19.5969	19.9896
19.6052	19.998
19.6136	20.0063
19.6219	20.0147
19.6303	20.023
19.6386	20.0314
19.647	20.0397
19.6554	20.0481
19.6637	20.0565
19.6721	20.0648
19.6804	20.0732
19.6888	20.0815
19.6971	20.0899
19.7055	20.0982
19.7139	20.1066
19.7222	20.1149
19.7306	20.1233
19.7389	20.1317
19.7473	20.14
19.7556	20.1484
19.764	20.1567
19.7723	20.1651
19.7807	20.1734
19.789	20.1818
19.7974	20.1901
19.8058	20.1985
19.8141	20.2068
19.8225	20.2152
19.8308	20.2236
19.8392	20.2319
19.8475	20.2403
19.8559	20.2486
19.8643	20.257
19.8726	20.2654
19.881	20.2737
19.8893	20.2821
19.8977	20.2904
19.906	20.2988
19.9144	20.3071
19.9228	20.3155
19.9311	20.3238
19.9395	20.3322
19.9478	20.3406
19.9562	20.3489
19.9645	20.3573
19.9729	20.3656
19.9812	20.374
19.9896	20.3823
19.998	20.3907
20.0063	20.399
20.0147	20.4074
20.023	20.4157
20.0314	20.4241
20.0397	20.4325
20.0481	20.4408
20.0565	20.4492
20.0648	20.4575
20.0732	20.4659
20.0815	20.4743
20.0899	20.4826
20.0982	20.491
20.1066	20.4993
20.1149	20.5077
20.1233	20.516
20.1317	20.5244
20.14	20.5327
20.1484	20.5411
20.1567	20.5495
20.1651	20.5578
20.1734	20.5662
20.1818	20.5745
20.1901	20.5829
20.1985	20.5912
20.2068	20.5996
20.2152	20.6079
20.2236	20.6163
20.2319	20.6246
20.2403	20.633
20.2486	20.6414
20.257	20.6497
20.2654	20.6581
20.2737	20.6664
20.2821	20.6748
20.2904	20.6832
20.2988	20.6915
20.3071	20.6999
20.3155	20.7082
20.3238	20.7166
20.3322	20.7249
20.3406	20.7333
20.3489	20.7416
20.3573	20.75
20.3656	20.7584
20.374	20.7667
20.3823	20.7751
20.3907	20.7834
20.399	20.7918
20.4074	20.8001
20.4157	20.8085
20.4241	20.8168
20.4325	20.8252
20.4408	20.8336
20.4492	20.8419
20.4575	20.8503
20.4659	20.8586
20.4743	20.867
20.4826	20.8753
20.491	20.8837
20.4993	20.8921
20.5077	20.9004
20.516	20.9088
20.5244	20.9171
20.5327	20.9255
20.5411	20.9338
20.5495	20.9422
20.5578	20.9505
20.5662	20.9589
20.5745	20.9672
20.5829	20.9756
20.5912	20.984
20.5996	20.9923
20.6079	21.0007
20.6163	21.009
20.6246	21.0174
20.633	21.0257
20.6414	21.0341
20.6497	21.0424
20.6581	21.0508
20.6664	21.0592
20.6748	21.0675
20.6832	21.0759
20.6915	21.0842
20.6999	21.0926
20.7082	21.101
20.7166	21.1093
20.7249	21.1177
20.7333	21.126
20.7416	21.1344
20.75	21.1427
20.7584	21.1511
20.7667	21.1594
20.7751	21.1678
20.7834	21.1761
20.7918	21.1845
20.8001	21.1929
20.8085	21.2012
20.8168	21.2096
20.8252	21.2179
20.8336	21.2263
20.8419	21.2346
20.8503	21.243
20.8586	21.2513
20.867	21.2597
20.8753	21.2681
20.8837	21.2764
20.8921	21.2848
20.9004	21.2931
20.9088	21.3015
20.9171	21.3099
20.9255	21.3182
20.9338	21.3266
20.9422	21.3349
20.9505	21.3433
20.9589	21.3516
20.9672	21.36
20.9756	21.3683
20.984	21.3767
20.9923	21.385
21.0007	21.3934
21.009	21.4018
21.0174	21.4101
21.0257	21.4185
21.0341	21.4268
21.0424	21.4352
21.0508	21.4435
21.0592	21.4519
21.0675	21.4602
21.0759	21.4686
21.0842	21.477
21.0926	21.4853
21.101	21.4937
21.1093	21.502
21.1177	21.5104
21.126	21.5188
21.1344	21.5271
21.1427	21.5355
21.1511	21.5438
21.1594	21.5522
21.1678	21.5605
21.1761	21.5689
21.1845	21.5772
21.1929	21.5856
21.2012	21.5939
21.2096	21.6023
21.2179	21.6107
21.2263	21.619
21.2346	21.6274
21.243	21.6357
21.2513	21.6441
21.2597	21.6524
21.2681	21.6608
21.2764	21.6692
21.2848	21.6775
21.2931	21.6859
21.3015	21.6942
21.3099	21.7026
21.3182	21.7109
21.3266	21.7193
21.3349	21.7277
21.3433	21.736
21.3516	21.7444
21.36	21.7527
21.3683	21.7611
21.3767	21.7694
21.385	21.7778
21.3934	21.7861
21.4018	21.7945
21.4101	21.8028
21.4185	21.8112
21.4268	21.8196
21.4352	21.8279
21.4435	21.8363
21.4519	21.8446
21.4602	21.853
21.4686	21.8613
21.477	21.8697
21.4853	21.8781
21.4937	21.8864
21.502	21.8948
21.5104	21.9031
21.5188	21.9115
21.5271	21.9198
21.5355	21.9282
21.5438	21.9366
21.5522	21.9449
21.5605	21.9533
21.5689	21.9616
21.5772	21.97
21.5856	21.9783
21.5939	21.9867
21.6023	21.995
21.6107	22.0034
21.619	22.0117
21.6274	22.0201
21.6357	22.0285
21.6441	22.0368
21.6524	22.0452
21.6608	22.0535
21.6692	22.0619
21.6775	22.0702
21.6859	22.0786
21.6942	22.087
21.7026	22.0953
21.7109	22.1037
21.7193	22.112
21.7277	22.1204
21.736	22.1287
21.7444	22.1371
21.7527	22.1455
21.7611	22.1538
21.7694	22.1622
21.7778	22.1705
21.7861	22.1789
21.7945	22.1872
21.8028	22.1956
21.8112	22.2039
21.8196	22.2123
21.8279	22.2206
21.8363	22.229
21.8446	22.2374
21.853	22.2457
21.8613	22.2541
21.8697	22.2624
21.8781	22.2708
21.8864	22.2791
21.8948	22.2875
21.9031	22.2959
21.9115	22.3042
21.9198	22.3126
21.9282	22.3209
21.9366	22.3293
21.9449	22.3376
21.9533	22.346
21.9616	22.3544
21.97	22.3627
21.9783	22.3711
21.9867	22.3794
21.995	22.3878
22.0034	22.3961
22.0117	22.4045
22.0201	22.4128
22.0285	22.4212
22.0368	22.4295
22.0452	22.4379
22.0535	22.4463
22.0619	22.4546
22.0702	22.463
22.0786	22.4713
22.087	22.4797
22.0953	22.488
22.1037	22.4964
22.112	22.5048
22.1204	22.5131
22.1287	22.5215
22.1371	22.5298
22.1455	22.5382
22.1538	22.5465
22.1622	22.5549
22.1705	22.5633
22.1789	22.5716
22.1872	22.58
22.1956	22.5883
22.2039	22.5967
22.2123	22.605
22.2206	22.6134
22.229	22.6217
22.2374	22.6301
22.2457	22.6384
22.2541	22.6468
22.2624	22.6552
22.2708	22.6635
22.2791	22.6719
22.2875	22.6802
22.2959	22.6886
22.3042	22.6969
22.3126	22.7053
22.3209	22.7137
22.3293	22.722
22.3376	22.7304
22.346	22.7387
22.3544	22.7471
22.3627	22.7554
22.3711	22.7638
22.3794	22.7721
22.3878	22.7805
22.3961	22.7889
22.4045	22.7972
22.4128	22.8056
22.4212	22.8139
22.4295	22.8223
22.4379	22.8306
22.4463	22.839
22.4546	22.8473
22.463	22.8557
22.4713	22.8641
22.4797	22.8724
22.488	22.8808
22.4964	22.8891
22.5048	22.8975
22.5131	22.9058
22.5215	22.9142
22.5298	22.9226
22.5382	22.9309
22.5465	22.9393
22.5549	22.9476
22.5633	22.956
22.5716	22.9643
22.58	22.9727
22.5883	22.981
22.5967	22.9894
22.605	22.9978
22.6134	23.0061
22.6217	23.0145
22.6301	23.0228
22.6384	23.0312
22.6468	23.0395
22.6552	23.0479
22.6635	23.0562
22.6719	23.0646
22.6802	23.073
22.6886	23.0813
22.6969	23.0897
22.7053	23.098
22.7137	23.1064
22.722	23.1147
22.7304	23.1231
22.7387	23.1315
22.7471	23.1398
22.7554	23.1482
22.7638	23.1565
22.7721	23.1649
22.7805	23.1732
22.7889	23.1816
22.7972	23.1899
22.8056	23.1983
22.8139	23.2067
22.8223	23.215
22.8306	23.2234
22.839	23.2317
22.8473	23.2401
22.8557	23.2484
22.8641	23.2568
22.8724	23.2651
22.8808	23.2735
22.8891	23.2819
22.8975	23.2902
22.9058	23.2986
22.9142	23.3069
22.9226	23.3153
22.9309	23.3236
22.9393	23.332
22.9476	23.3404
22.956	23.3487
22.9643	23.3571
22.9727	23.3654
22.981	23.3738
22.9894	23.3821
22.9978	23.3905
23.0061	23.3988
23.0145	23.4072
23.0228	23.4156
23.0312	23.4239
23.0395	23.4323
23.0479	23.4406
23.0562	23.449
23.0646	23.4573
23.073	23.4657
23.0813	23.474
23.0897	23.4824
23.098	23.4908
23.1064	23.4991
23.1147	23.5075
23.1231	23.5158
23.1315	23.5242
23.1398	23.5325
23.1482	23.5409
23.1565	23.5493
23.1649	23.5576
23.1732	23.566
23.1816	23.5743
23.1899	23.5827
23.1983	23.591
23.2067	23.5994
23.215	23.6077
23.2234	23.6161
23.2317	23.6245
23.2401	23.6328
23.2484	23.6412
23.2568	23.6495
23.2651	23.6579
23.2735	23.6662
23.2819	23.6746
23.2902	23.683
23.2986	23.6913
23.3069	23.6997
23.3153	23.708
23.3236	23.7164
23.332	23.7247
23.3404	23.7331
23.3487	23.7414
23.3571	23.7498
23.3654	23.7582
23.3738	23.7665
23.3821	23.7749
23.3905	23.7832
23.3988	23.7916
23.4072	23.7999
23.4156	23.8083
23.4239	23.8166
23.4323	23.825
23.4406	23.8334
23.449	23.8417
23.4573	23.8501
23.4657	23.8584
23.474	23.8668
23.4824	23.8751
23.4908	23.8835
23.4991	23.8919
23.5075	23.9002
23.5158	23.9086
23.5242	23.9169
23.5325	23.9253
23.5409	23.9336
23.5493	23.942
23.5576	23.9503
23.566	23.9587
23.5743	23.9671
23.5827	23.9754
23.591	23.9838
23.5994	23.9921
23.6077	24.0005
23.6161	24.0088
23.6245	24.0172
23.6328	24.0255
23.6412	24.0339
23.6495	24.0423
23.6579	24.0506
23.6662	24.059
23.6746	24.0673
23.683	24.0757
23.6913	24.084
23.6997	24.0924
23.708	24.1008
23.7164	24.1091
23.7247	24.1175
23.7331	24.1258
23.7414	24.1342
23.7498	24.1425
23.7582	24.1509
23.7665	24.1592
23.7749	24.1676
23.7832	24.176
23.7916	24.1843
23.7999	24.1927
23.8083	24.201
23.8166	24.2094
23.825	24.2177
23.8334	24.2261
23.8417	24.2344
23.8501	24.2428
23.8584	24.2512
23.8668	24.2595
23.8751	24.2679
23.8835	24.2762
23.8919	24.2846
23.9002	24.2929
23.9086	24.3013
23.9169	24.3097
23.9253	24.318
23.9336	24.3264
23.942	24.3347
23.9503	24.3431
23.9587	24.3514
23.9671	24.3598
23.9754	24.3681
23.9838	24.3765
23.9921	24.3849
24.0005	24.3932
24.0088	24.4016
24.0172	24.4099
24.0255	24.4183
24.0339	24.4266
24.0423	24.435
24.0506	24.4433
24.059	24.4517
24.0673	24.4601
24.0757	24.4684
24.084	24.4768
24.0924	24.4851
24.1008	24.4935
24.1091	24.5018
24.1175	24.5102
24.1258	24.5186
24.1342	24.5269
24.1425	24.5353
24.1509	24.5436
24.1592	24.552
24.1676	24.5603
24.176	24.5687
24.1843	24.577
24.1927	24.5854
24.201	24.5938
24.2094	24.6021
24.2177	24.6105
24.2261	24.6188
24.2344	24.6272
24.2428	24.6355
24.2512	24.6439
24.2595	24.6522
24.2679	24.6606
24.2762	24.669
24.2846	24.6773
24.2929	24.6857
24.3013	24.694
24.3097	24.7024
24.318	24.7107
24.3264	24.7191
24.3347	24.7275
24.3431	24.7358
24.3514	24.7442
24.3598	24.7525
24.3681	24.7609
24.3765	24.7692
24.3849	24.7776
24.3932	24.7859
24.4016	24.7943
24.4099	24.8026
24.4183	24.811
24.4266	24.8194
24.435	24.8277
24.4433	24.8361
24.4517	24.8444
24.4601	24.8528
24.4684	24.8611
24.4768	24.8695
24.4851	24.8779
24.4935	24.8862
24.5018	24.8946
24.5102	24.9029
24.5186	24.9113
24.5269	24.9196
24.5353	24.928
24.5436	24.9364
24.552	24.9447
24.5603	24.9531
24.5687	24.9614
24.577	24.9698
24.5854	24.9781
24.5938	24.9865
24.6021	24.9948
24.6105	25.0032
24.6188	25.0115
24.6272	25.0199
24.6355	25.0283
24.6439	25.0366
24.6522	25.045
24.6606	25.0533
24.669	25.0617
24.6773	25.07
24.6857	25.0784
24.694	25.0868
24.7024	25.0951
24.7107	25.1035
24.7191	25.1118
24.7275	25.1202
24.7358	25.1285
24.7442	25.1369
24.7525	25.1453
24.7609	25.1536
24.7692	25.162
24.7776	25.1703
24.7859	25.1787
24.7943	25.187
24.8026	25.1954
24.811	25.2037
24.8194	25.2121
24.8277	25.2205
24.8361	25.2288
24.8444	25.2372
24.8528	25.2455
24.8611	25.2539
24.8695	25.2622
24.8779	25.2706
24.8862	25.2789
24.8946	25.2873
24.9029	25.2957
24.9113	25.304
24.9196	25.3124
24.928	25.3207
24.9364	25.3291
24.9447	25.3374
24.9531	25.3458
24.9614	25.3542
24.9698	25.3625
24.9781	25.3709
24.9865	25.3792
24.9948	25.3876
25.0032	25.3959
25.0115	25.4043
25.0199	25.4126
25.0283	25.421
25.0366	25.4293
25.045	25.4377
25.0533	25.4461
25.0617	25.4544
25.07	25.4628
25.0784	25.4711
25.0868	25.4795
25.0951	25.4879
25.1035	25.4962
25.1118	25.5046
25.1202	25.5129
25.1285	25.5213
25.1369	25.5296
25.1453	25.538
25.1536	25.5463
25.162	25.5547
25.1703	25.5631
25.1787	25.5714
25.187	25.5798
25.1954	25.5881
25.2037	25.5965
25.2121	25.6048
25.2205	25.6132
25.2288	25.6215
25.2372	25.6299
25.2455	25.6382
25.2539	25.6466
25.2622	25.655
25.2706	25.6633
25.2789	25.6717
25.2873	25.68
25.2957	25.6884
25.304	25.6968
25.3124	25.7051
25.3207	25.7135
25.3291	25.7218
25.3374	25.7302
25.3458	25.7385
25.3542	25.7469
25.3625	25.7552
25.3709	25.7636
25.3792	25.772
25.3876	25.7803
25.3959	25.7887
25.4043	25.797
25.4126	25.8054
25.421	25.8137
25.4293	25.8221
25.4377	25.8304
25.4461	25.8388
25.4544	25.8471
25.4628	25.8555
25.4711	25.8639
25.4795	25.8722
25.4879	25.8806
25.4962	25.8889
25.5046	25.8973
25.5129	25.9057
25.5213	25.914
25.5296	25.9224
25.538	25.9307
25.5463	25.9391
25.5547	25.9474
25.5631	25.9558
25.5714	25.9641
25.5798	25.9725
25.5881	25.9809
25.5965	25.9892
25.6048	25.9976
25.6132	26.0059
25.6215	26.0143
25.6299	26.0226
25.6382	26.031
25.6466	26.0393
25.655	26.0477
25.6633	26.0561
25.6717	26.0644
25.68	26.0728
25.6884	26.0811
25.6968	26.0895
25.7051	26.0978
25.7135	26.1062
25.7218	26.1146
25.7302	26.1229
25.7385	26.1313
25.7469	26.1396
25.7552	26.148
25.7636	26.1563
25.772	26.1647
25.7803	26.173
25.7887	26.1814
25.797	26.1898
25.8054	26.1981
25.8137	26.2065
25.8221	26.2148
25.8304	26.2232
25.8388	26.2315
25.8471	26.2399
25.8555	26.2482
25.8639	26.2566
25.8722	26.265
25.8806	26.2733
25.8889	26.2817
25.8973	26.29
25.9057	26.2984
25.914	26.3067
25.9224	26.3151
25.9307	26.3235
25.9391	26.3318
25.9474	26.3402
25.9558	26.3485
25.9641	26.3569
25.9725	26.3652
25.9809	26.3736
25.9892	26.3819
25.9976	26.3903
26.0059	26.3986
26.0143	26.407
26.0226	26.4154
26.031	26.4237
26.0393	26.4321
26.0477	26.4404
26.0561	26.4488
26.0644	26.4571
26.0728	26.4655
26.0811	26.4738
26.0895	26.4822
26.0978	26.4906
26.1062	26.4989
26.1146	26.5073
26.1229	26.5156
26.1313	26.524
26.1396	26.5324
26.148	26.5407
26.1563	26.5491
26.1647	26.5574
26.173	26.5658
26.1814	26.5741
26.1898	26.5825
26.1981	26.5908
26.2065	26.5992
26.2148	26.6075
26.2232	26.6159
26.2315	26.6243
26.2399	26.6326
26.2482	26.641
26.2566	26.6493
26.265	26.6577
26.2733	26.666
26.2817	26.6744
26.29	26.6827
26.2984	26.6911
26.3067	26.6995
26.3151	26.7078
26.3235	26.7162
26.3318	26.7245
26.3402	26.7329
26.3485	26.7413
26.3569	26.7496
26.3652	26.758
26.3736	26.7663
26.3819	26.7747
26.3903	26.783
26.3986	26.7914
26.407	26.7997
26.4154	26.8081
26.4237	26.8164
26.4321	26.8248
26.4404	26.8332
26.4488	26.8415
26.4571	26.8499
26.4655	26.8582
26.4738	26.8666
26.4822	26.8749
26.4906	26.8833
26.4989	26.8916
26.5073	26.9
26.5156	26.9084
26.524	26.9167
26.5324	26.9251
26.5407	26.9334
26.5491	26.9418
26.5574	26.9502
26.5658	26.9585
26.5741	26.9669
26.5825	26.9752
26.5908	26.9836
26.5992	26.9919
26.6075	27.0003
26.6159	27.0086
26.6243	27.017
26.6326	27.0253
26.641	27.0337
26.6493	27.0421
26.6577	27.0504
26.666	27.0588
26.6744	27.0671
26.6827	27.0755
[truncated: 7,577 more rows]
